# Supplementary material for: Antibacterial Secondary Metabolites from Marine-Derived Fungus Aspergillus sp. IMCASMF180035
Source: PubMed Central journal article supplement (PMC8066187; doi:10.3390/antibiotics10040377), 2021-04-03
Supplement: antibiotics-10-00377-s001.pdf [file antibiotics-10-00377-s001.pdf]

## **SUPPLEMENTARY MATERIAL**

### **Antibacterial Secondary Metabolites from Marine-derived Fungus *Aspergillus* sp. IMCASMF180035**

**Fuhang Song<sup>1,\*</sup> Rui Lin<sup>2</sup>, Na Yang<sup>3,4</sup>, Jia Jia<sup>5</sup>, Shangzhu Wei<sup>2</sup>, Jiahui Han<sup>2</sup>, Jiangpeng Li<sup>2</sup>,  
Hongkai Bi<sup>5</sup> and Xiuli Xu<sup>2,\*</sup>**

**Table of Contents**

|                                                                                                                           |    |
|---------------------------------------------------------------------------------------------------------------------------|----|
| <b>Figure S1.</b> HRESIMS spectrum for <b>1</b> .....                                                                     | 3  |
| <b>Figure S2.</b> <sup>1</sup> H NMR spectrum (500 MHz, DMSO- <i>d</i> <sub>6</sub> ) of <b>1</b> .....                   | 3  |
| <b>Figure S3.</b> <sup>13</sup> C NMR spectrum (125 MHz, DMSO- <i>d</i> <sub>6</sub> ) of <b>1</b> .....                  | 4  |
| <b>Figure S4.</b> HSQC spectrum (500 MHz, DMSO- <i>d</i> <sub>6</sub> ) of <b>1</b> .....                                 | 4  |
| <b>Figure S5.</b> <sup>1</sup> H - <sup>1</sup> H COSY spectrum (500 MHz, DMSO- <i>d</i> <sub>6</sub> ) of <b>1</b> ..... | 5  |
| <b>Figure S6.</b> HMBC spectrum (500 MHz, DMSO- <i>d</i> <sub>6</sub> ) of <b>1</b> .....                                 | 5  |
| <b>Figure S7.</b> Expansion of HMBC spectrum (500 MHz, DMSO- <i>d</i> <sub>6</sub> ) of <b>1</b> .....                    | 6  |
| <b>Figure S8.</b> Expansion of HMBC spectrum (500 MHz, DMSO- <i>d</i> <sub>6</sub> ) of <b>1</b> .....                    | 6  |
| <b>Figure S9.</b> HPLC profile of <b>1</b> .....                                                                          | 7  |
| <b>Figure S10.</b> HRESIMS spectrum for <b>2</b> .....                                                                    | 7  |
| <b>Figure S11.</b> <sup>1</sup> H NMR spectrum (500 MHz, CDCl <sub>3</sub> ) of <b>2</b> .....                            | 8  |
| <b>Figure S12.</b> <sup>13</sup> C NMR spectrum (125 MHz, CDCl <sub>3</sub> ) of <b>2</b> .....                           | 8  |
| <b>Figure S13.</b> HSQC spectrum (500 MHz, CDCl <sub>3</sub> ) of <b>2</b> .....                                          | 9  |
| <b>Figure S14.</b> <sup>1</sup> H - <sup>1</sup> H COSY spectrum (500MHz, CDCl <sub>3</sub> ) of <b>2</b> .....           | 9  |
| <b>Figure S15.</b> HMBC spectrum (500MHz, CDCl <sub>3</sub> ) <b>2</b> .....                                              | 10 |
| <b>Figure S16.</b> HPLC profile of <b>2</b> .....                                                                         | 10 |
| <b>Figure S17.</b> HRESIMS spectrum for <b>3</b> .....                                                                    | 11 |
| <b>Figure S18.</b> <sup>1</sup> H NMR spectrum (500 MHz, DMSO- <i>d</i> <sub>6</sub> ) of <b>3</b> .....                  | 11 |
| <b>Figure S19.</b> <sup>13</sup> C NMR spectrum (125 MHz, DMSO- <i>d</i> <sub>6</sub> ) of <b>3</b> .....                 | 12 |
| <b>Figure S20.</b> HSQC spectrum (500 MHz, DMSO- <i>d</i> <sub>6</sub> ) of <b>3</b> .....                                | 12 |
| <b>Figure S21.</b> HMBC spectrum (500 MHz, DMSO- <i>d</i> <sub>6</sub> ) of <b>3</b> .....                                | 13 |
| <b>Figure S22.</b> HPLC profile of <b>3</b> .....                                                                         | 13 |
| <b>Figure S23.</b> HRESIMS spectrum for <b>4</b> .....                                                                    | 14 |
| <b>Figure S24.</b> <sup>1</sup> H NMR spectrum (500 MHz, DMSO- <i>d</i> <sub>6</sub> ) of <b>4</b> .....                  | 14 |
| <b>Figure S25.</b> <sup>13</sup> C NMR spectrum (125 MHz, DMSO- <i>d</i> <sub>6</sub> ) of <b>4</b> .....                 | 15 |
| <b>Figure S26.</b> HSQC spectrum (500 MHz, DMSO- <i>d</i> <sub>6</sub> ) of <b>4</b> .....                                | 15 |
| <b>Figure S27.</b> HMBC spectrum (500 MHz, DMSO- <i>d</i> <sub>6</sub> ) of <b>4</b> .....                                | 16 |
| <b>Figure S28.</b> HPLC profile of <b>4</b> .....                                                                         | 16 |
| <b>Figure S29.</b> Neighbor-joining phylogenetic tree of strain IMCASMF180035.....                                        | 17 |

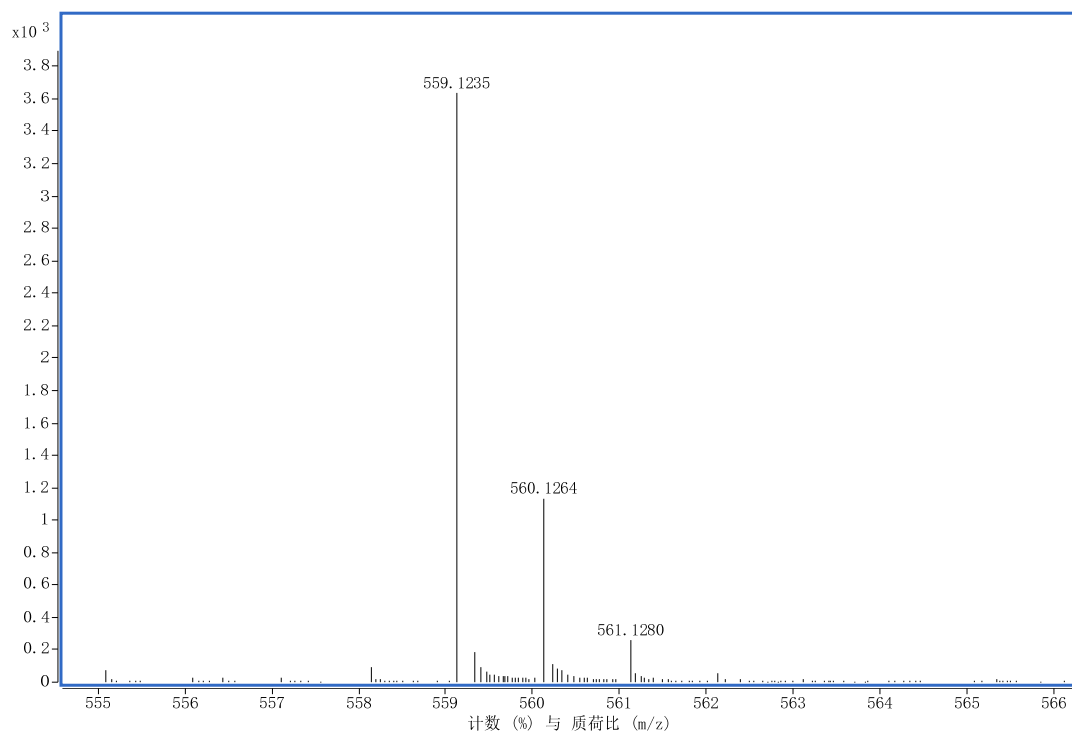

Figure S1. HRESIMS spectrum for compound 1

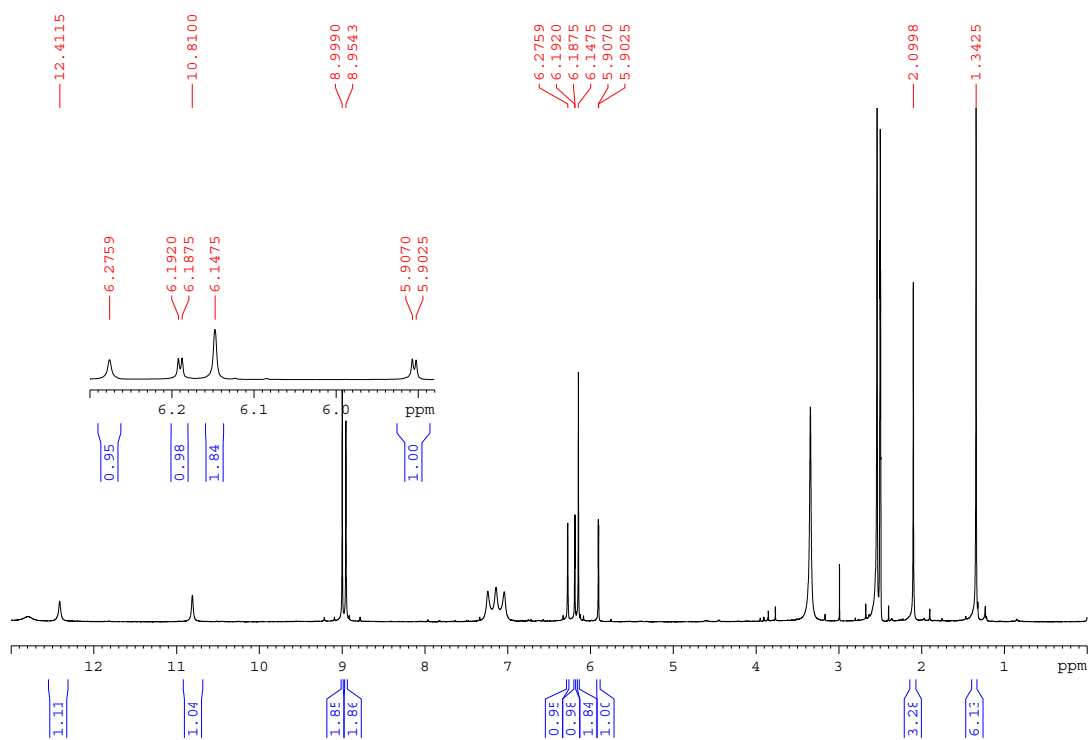

**Figure S2.**  $^1\text{H}$  NMR spectrum (500 MHz,  $\text{DMSO-}d_6$ ) of **1**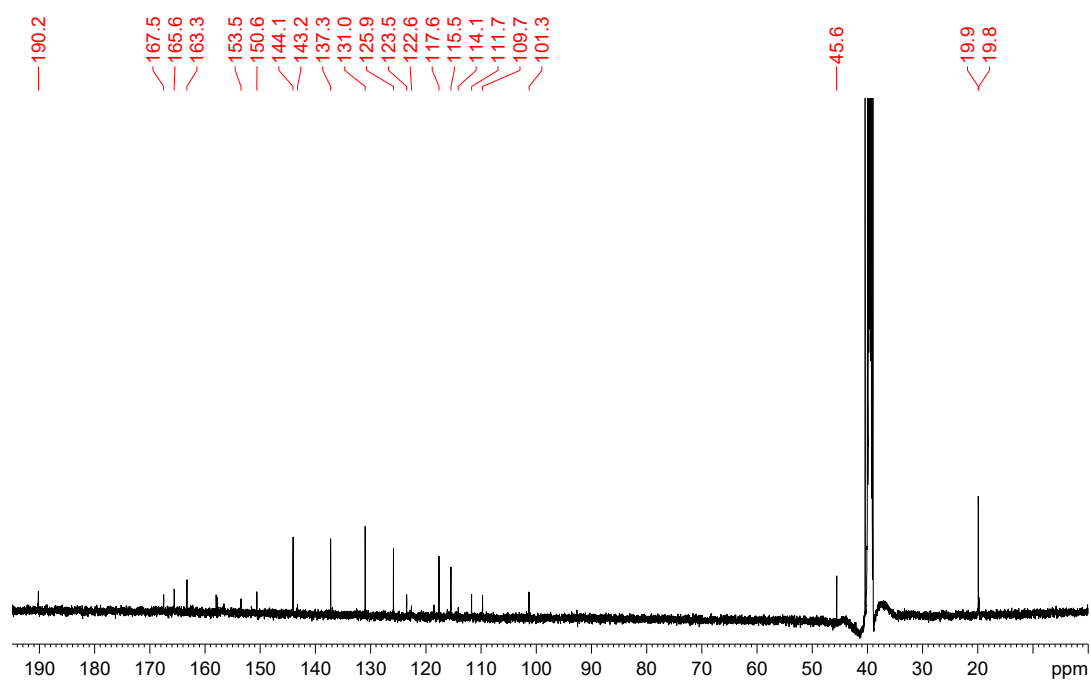**Figure S3.**  $^{13}\text{C}$  NMR spectrum (125 MHz,  $\text{DMSO-}d_6$ ) of **1**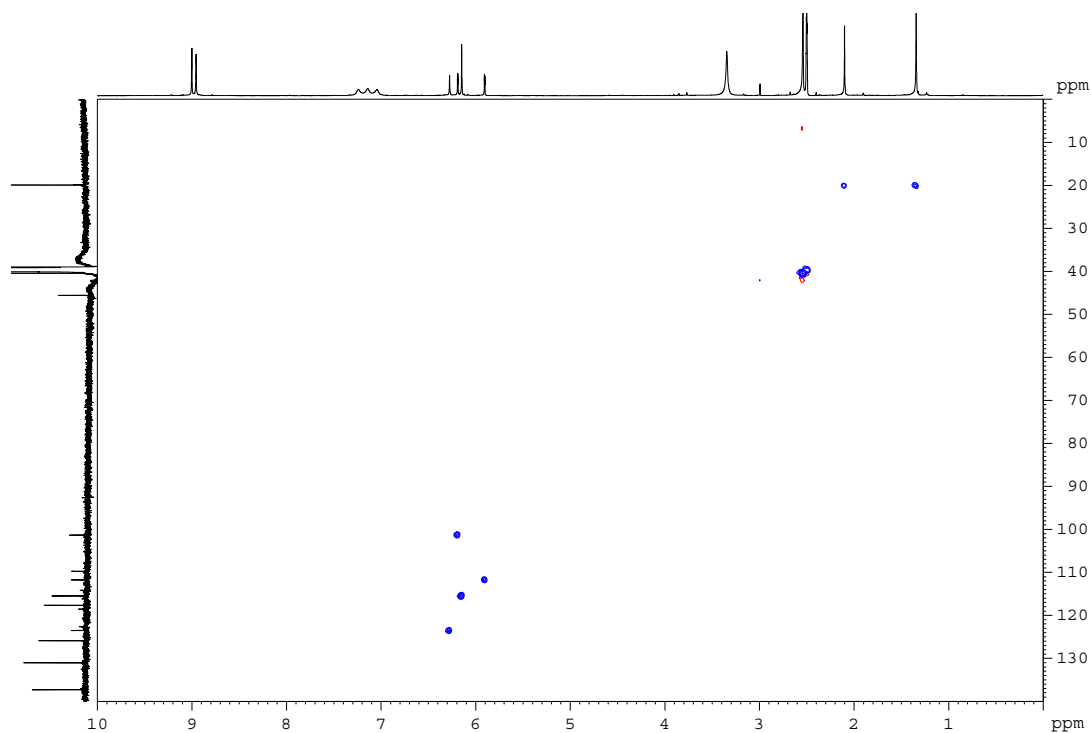**Figure S4.** HSQC spectrum (500 MHz,  $\text{DMSO-}d_6$ ) of **1**

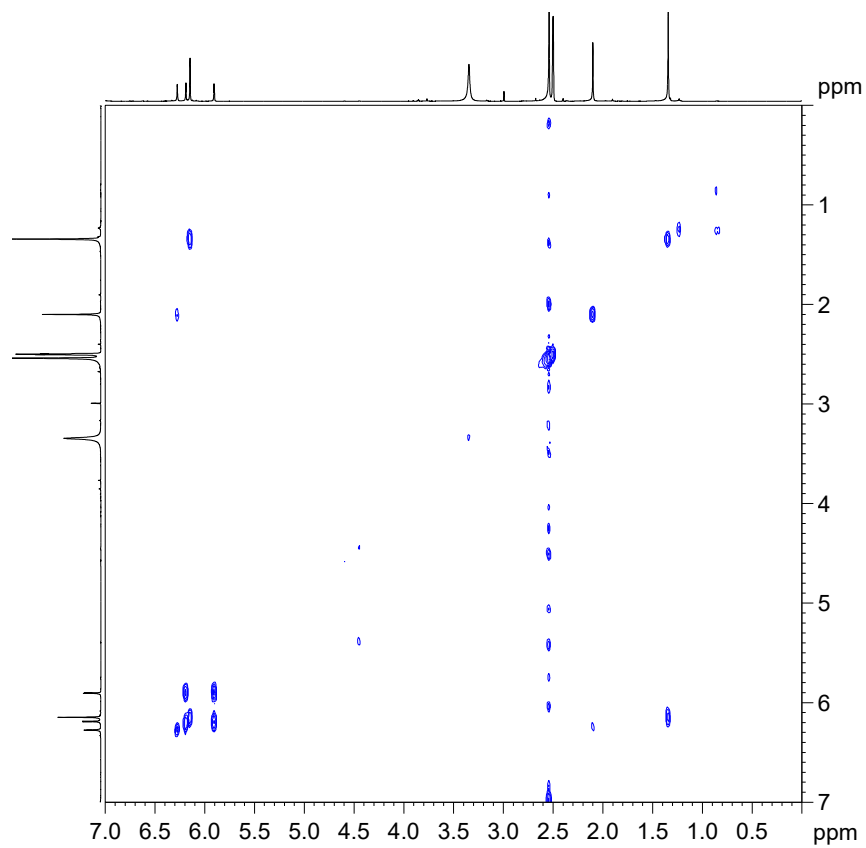

**Figure S5.**  $^1\text{H}$ - $^1\text{H}$  COSY spectrum (500 MHz,  $\text{DMSO-}d_6$ ) of **1**

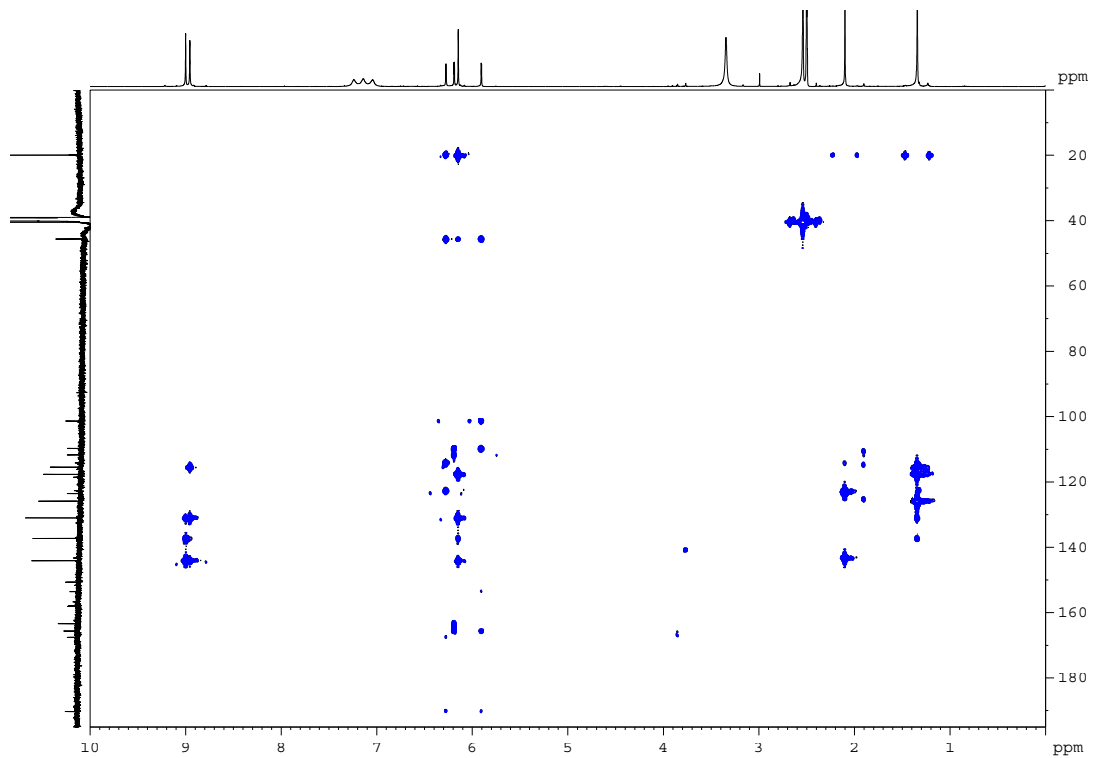

**Figure S6.** HMBC spectrum (500 MHz,  $\text{DMSO-}d_6$ ) of **1**

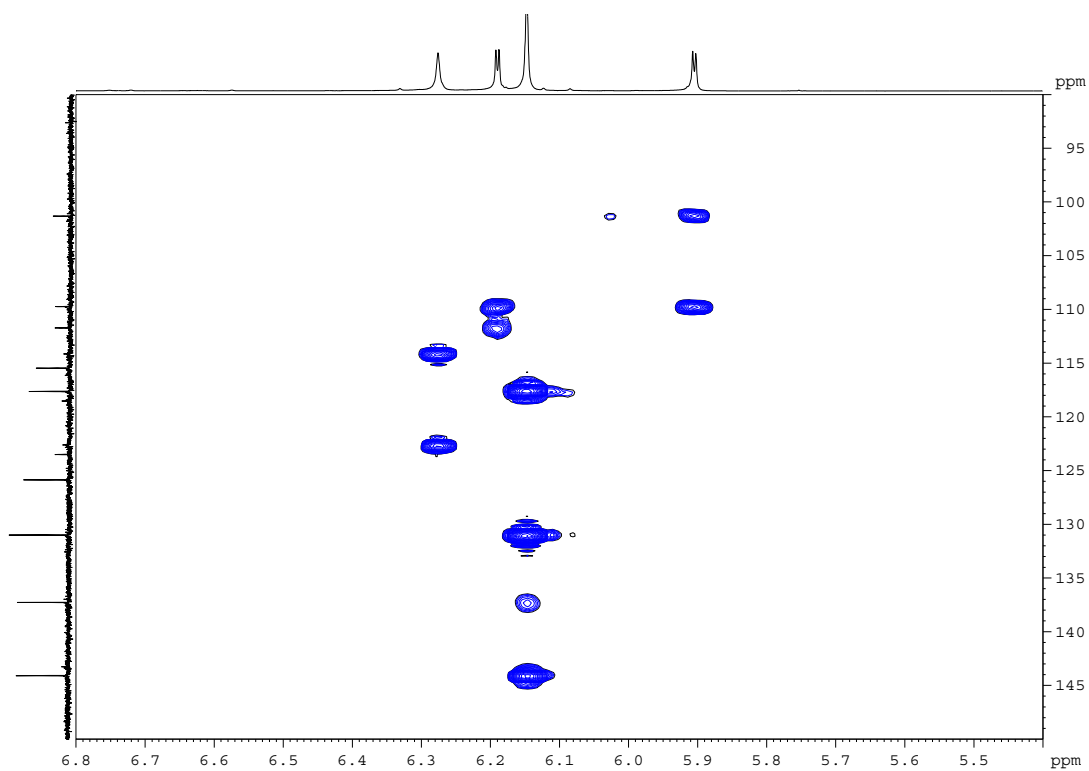

**Figure S7.** Expansion of HMBC spectrum (500 MHz, DMSO-*d*<sub>6</sub>) of **1**

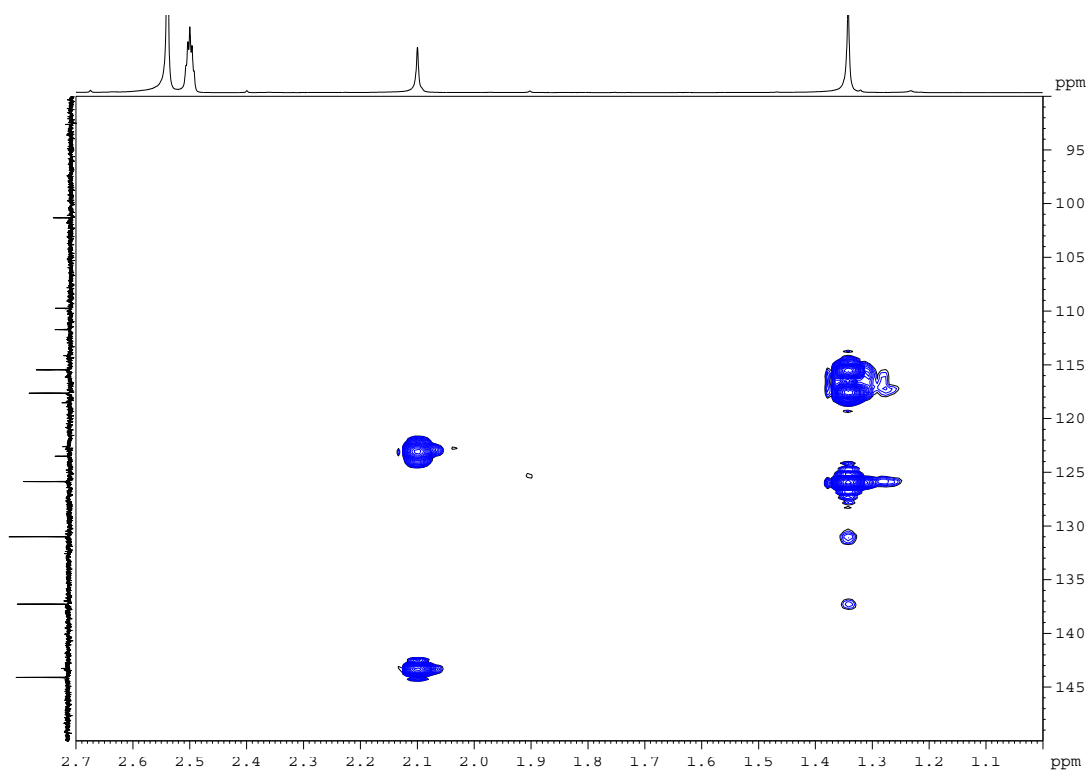

**Figure S8.** Expansion of HMBC spectrum (500 MHz, DMSO-*d*<sub>6</sub>) of **1**

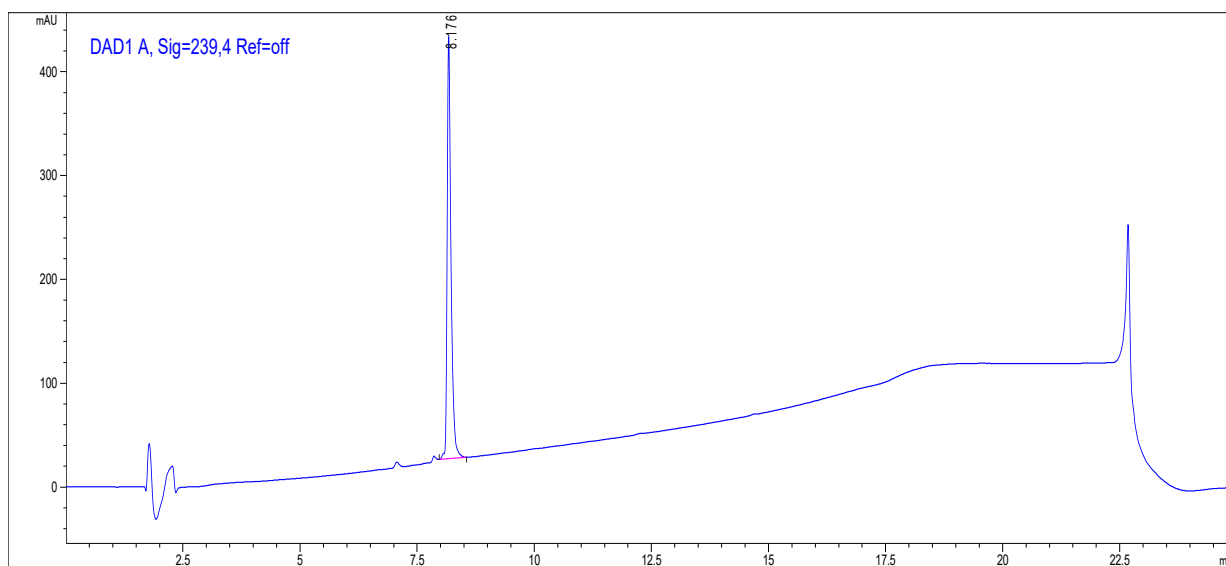

Figure S9. HPLC profile of **1**

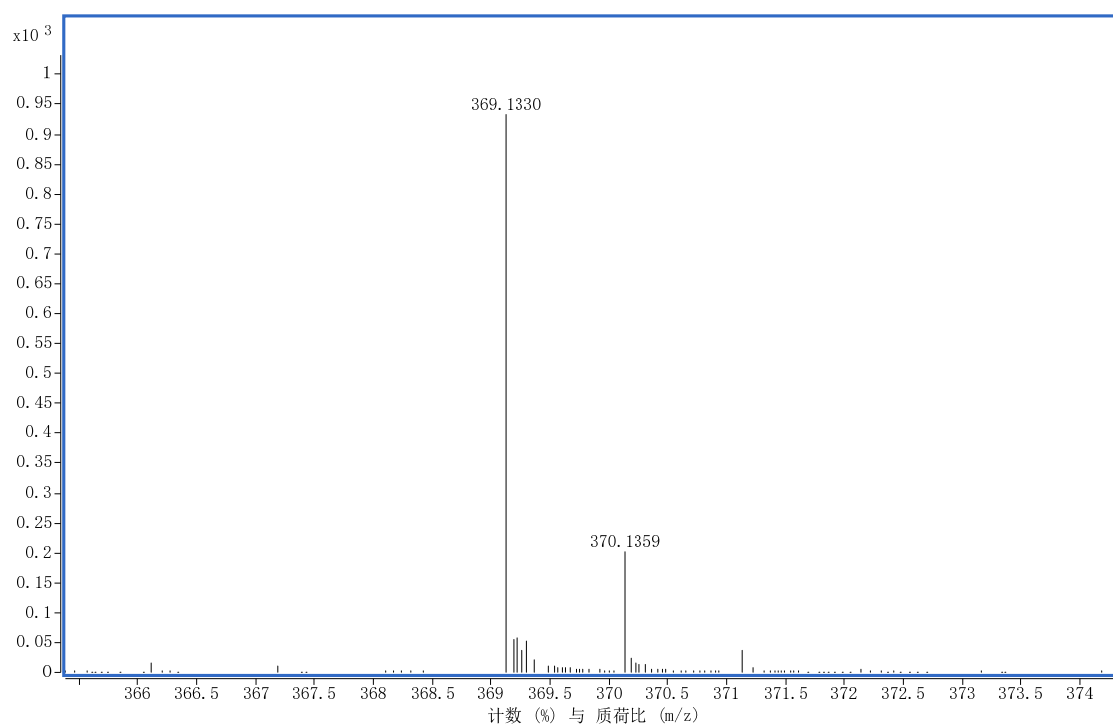

Figure S10. HRESIMS spectrum of for **2**

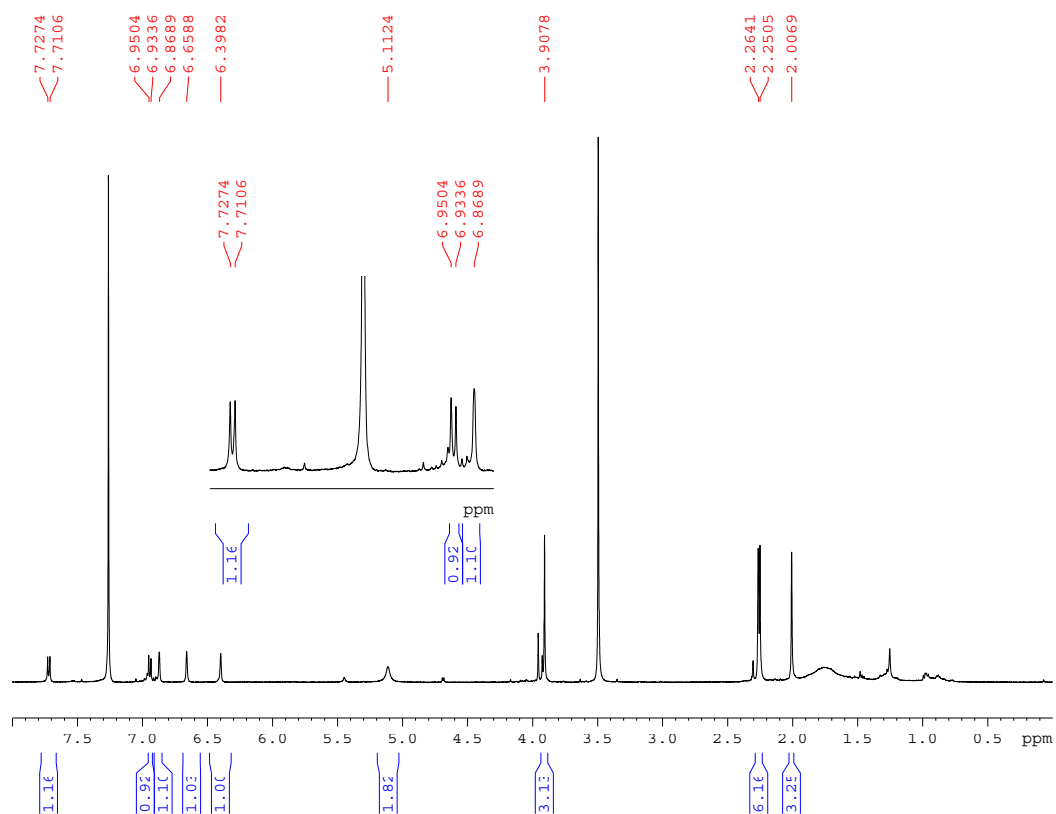Figure S11. <sup>1</sup>H NMR spectrum (500 MHz, CDCl<sub>3</sub>) of 2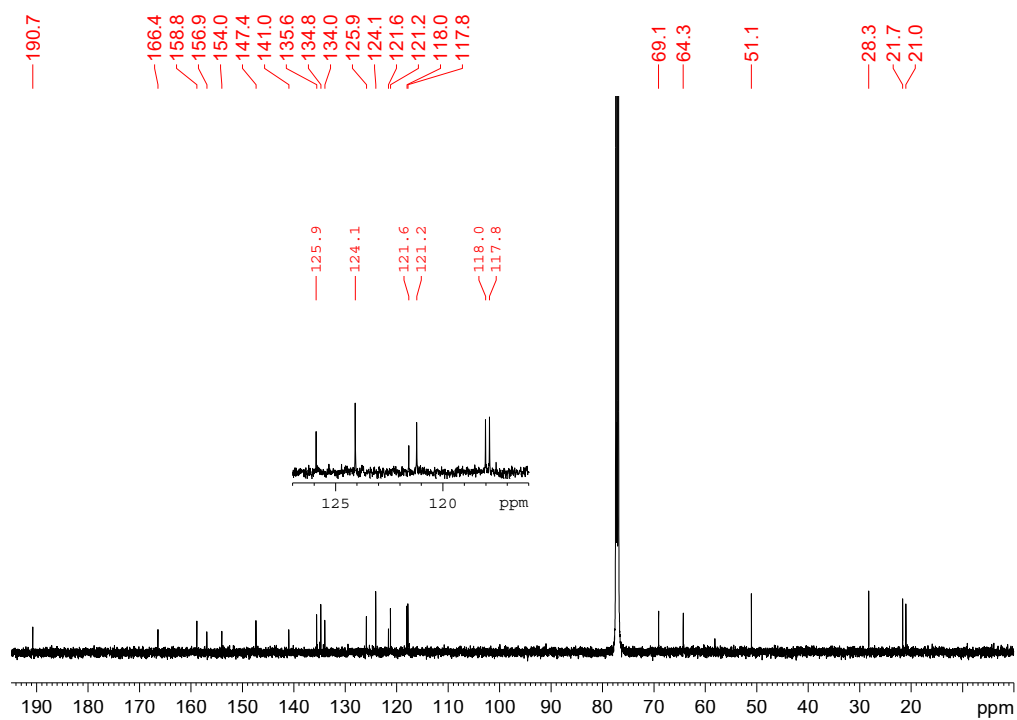Figure S12. <sup>13</sup>C NMR spectrum (125 MHz, CDCl<sub>3</sub>) of 2



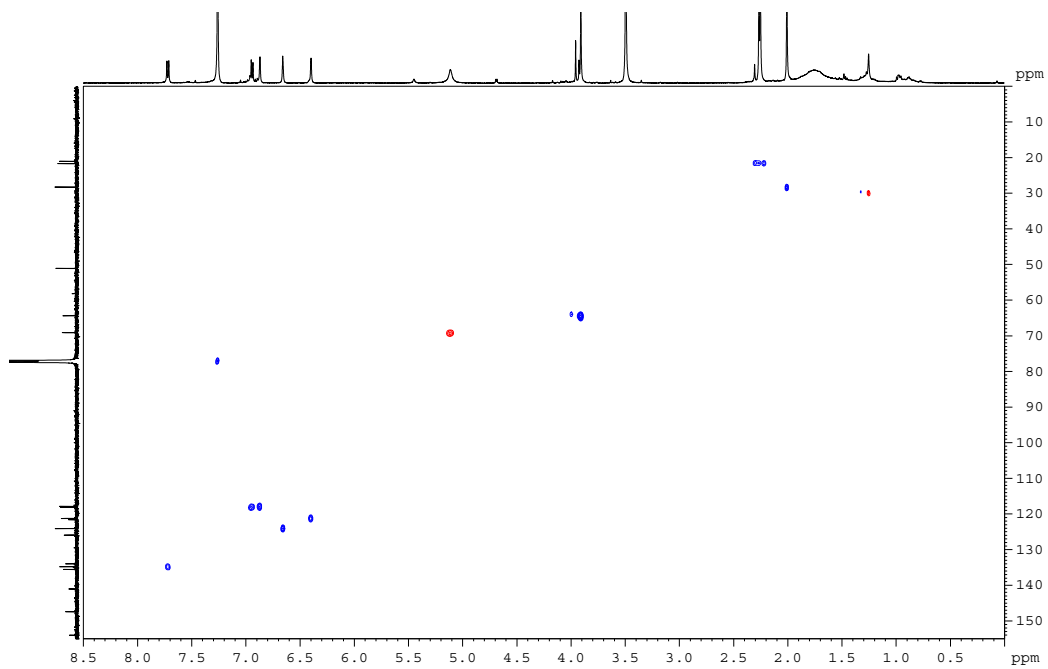

**Figure S13.** HSQC spectrum (500 MHz, CDCl<sub>3</sub>) of **2**

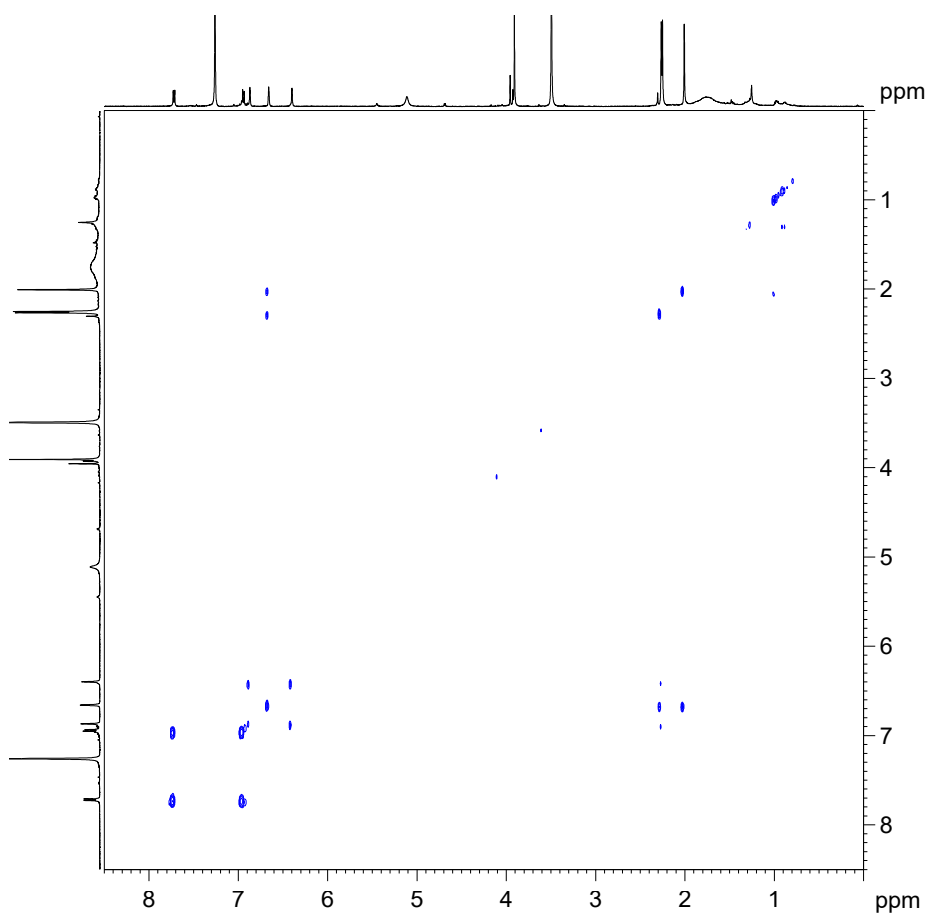

**Figure S14.** <sup>1</sup>H -<sup>1</sup>H COSY spectrum (500MHz, CDCl<sub>3</sub>) of **2**

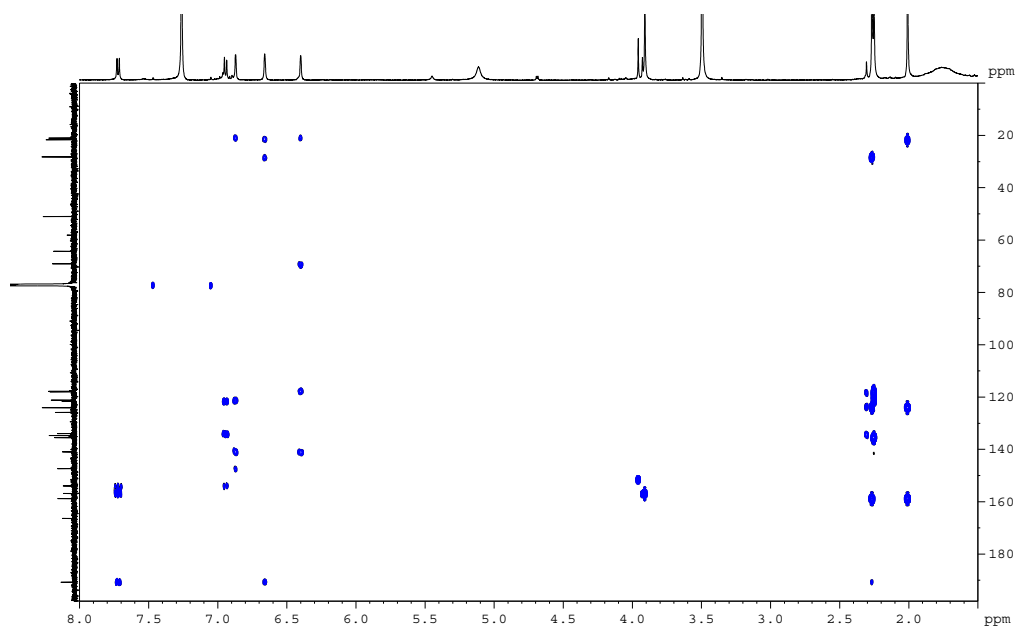

**Figure S15.** HMBC spectrum (500 MHz, CDCl<sub>3</sub>) of **2**

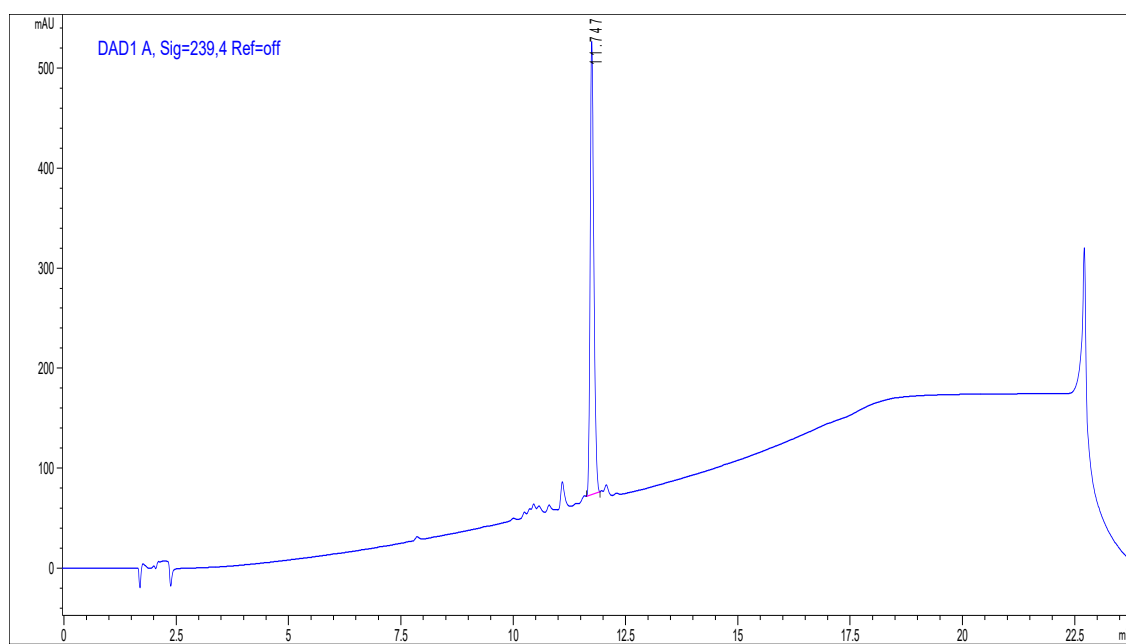

**Figure S16.** HPLC profile of **2**

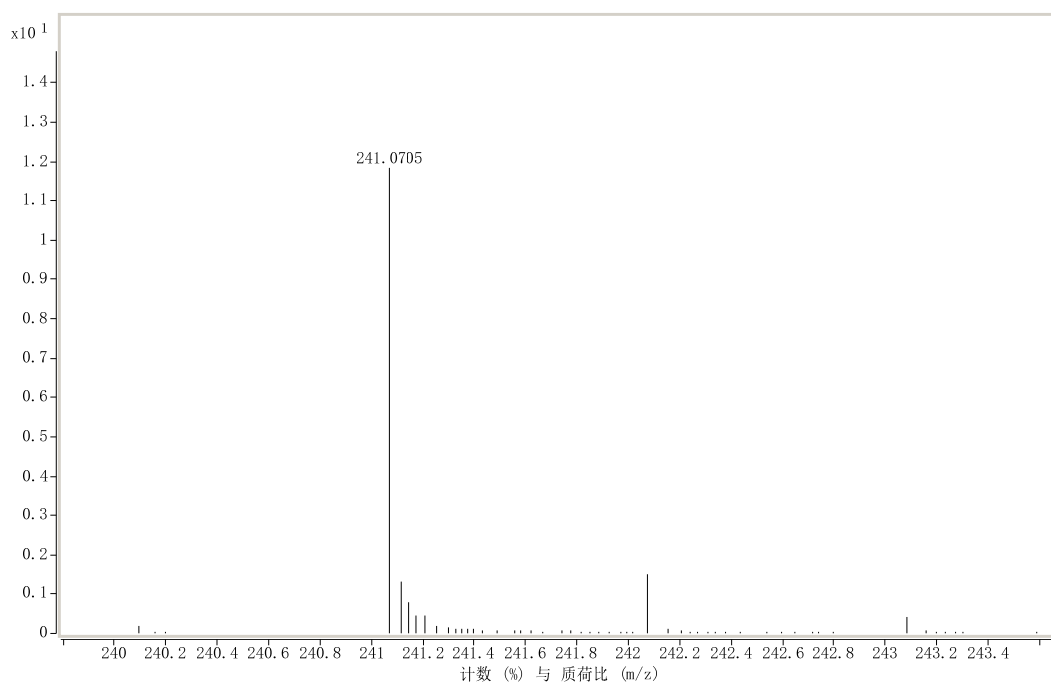

**Figure S17.** HRESIMS spectrum for **3**

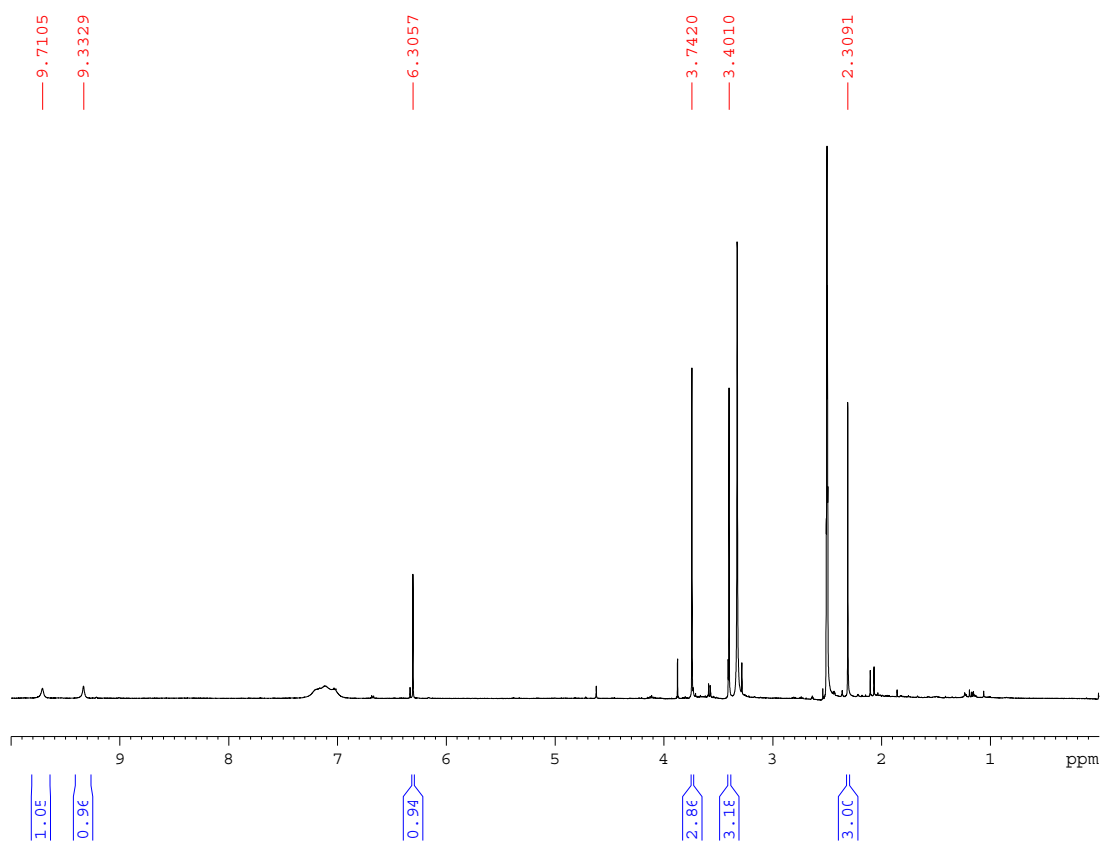

**Figure S18.**  $^1\text{H}$  NMR spectrum (500 MHz,  $\text{DMSO-}d_6$ ) of **3**

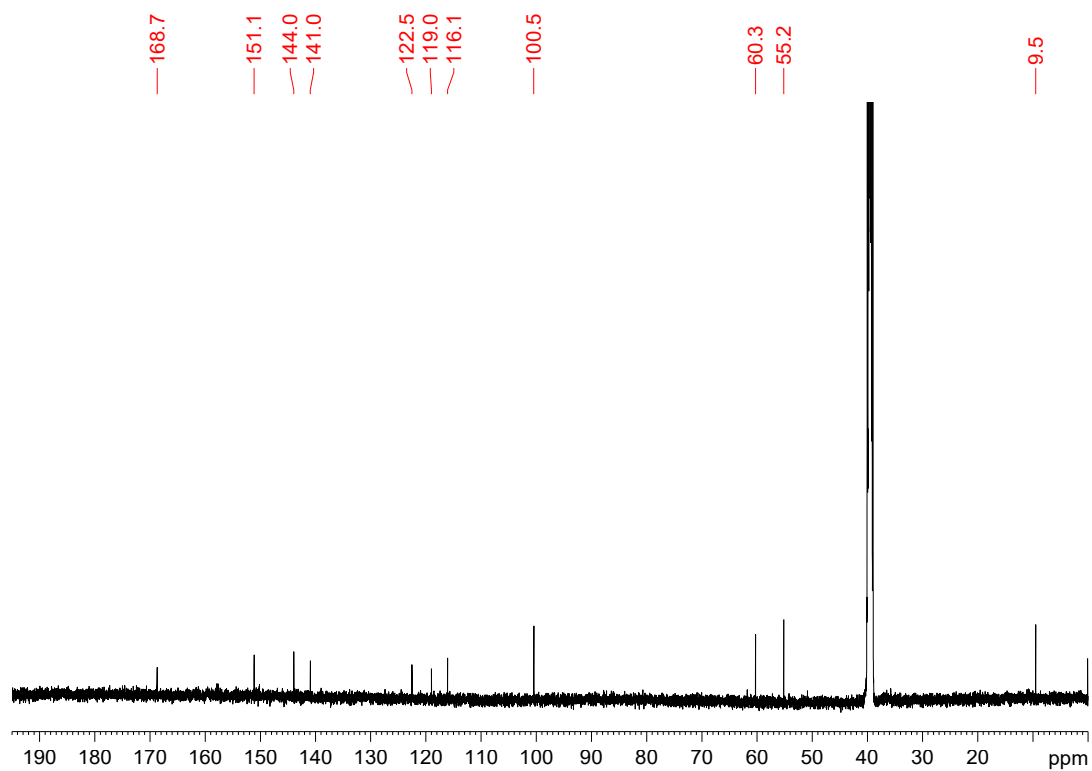

Figure S19.  $^{13}\text{C}$  NMR spectrum (125 MHz,  $\text{DMSO-}d_6$ ) of **3**

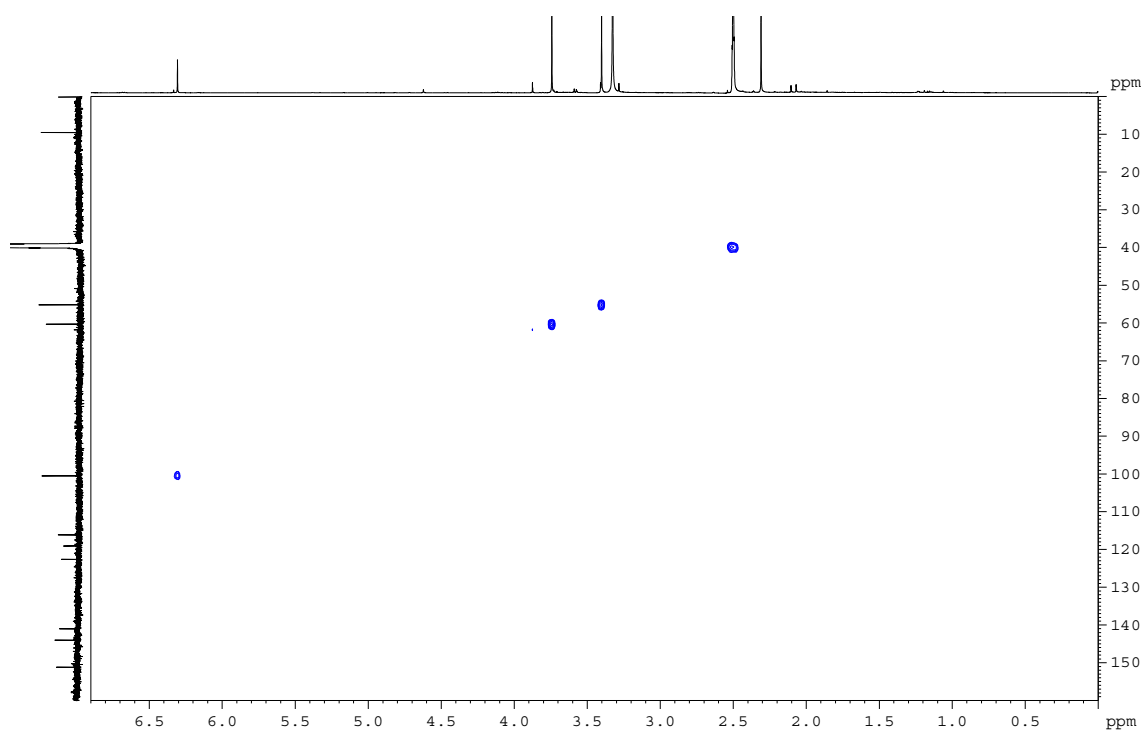

Figure S20. HSQC spectrum (500 MHz,  $\text{DMSO-}d_6$ ) of **3**

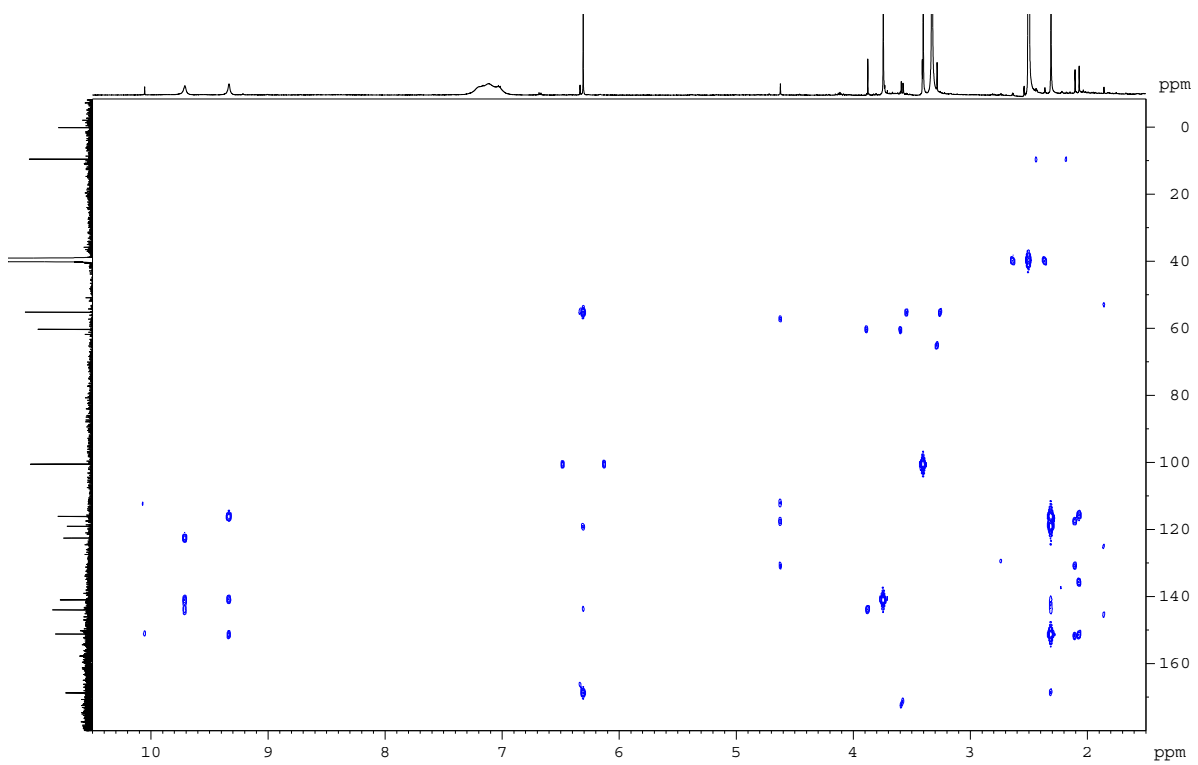

**Figure S21.** HMBC spectrum (500 MHz,  $\text{DMSO-}d_6$ ) of **3**

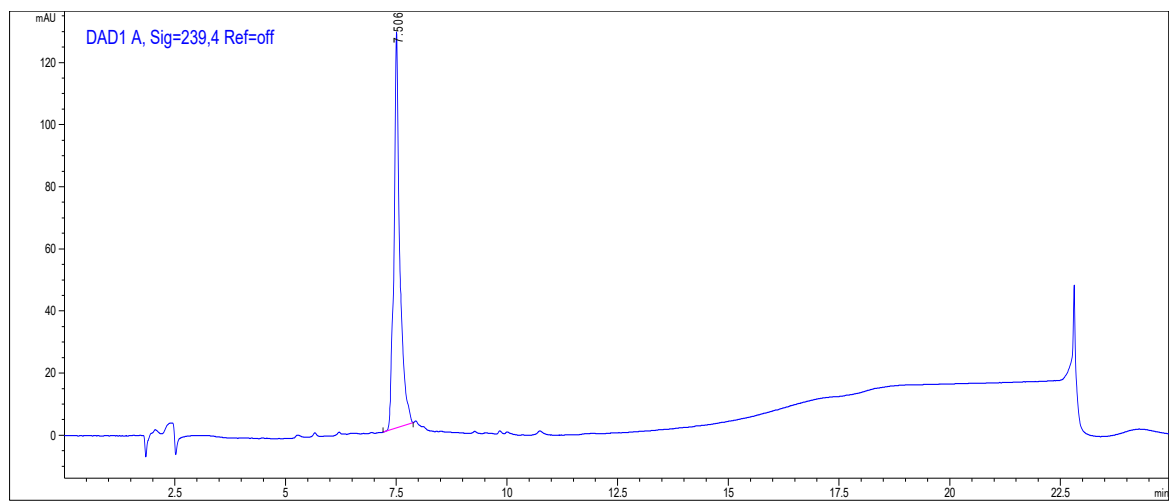

**Figure S22.** HPLC profile of **3**

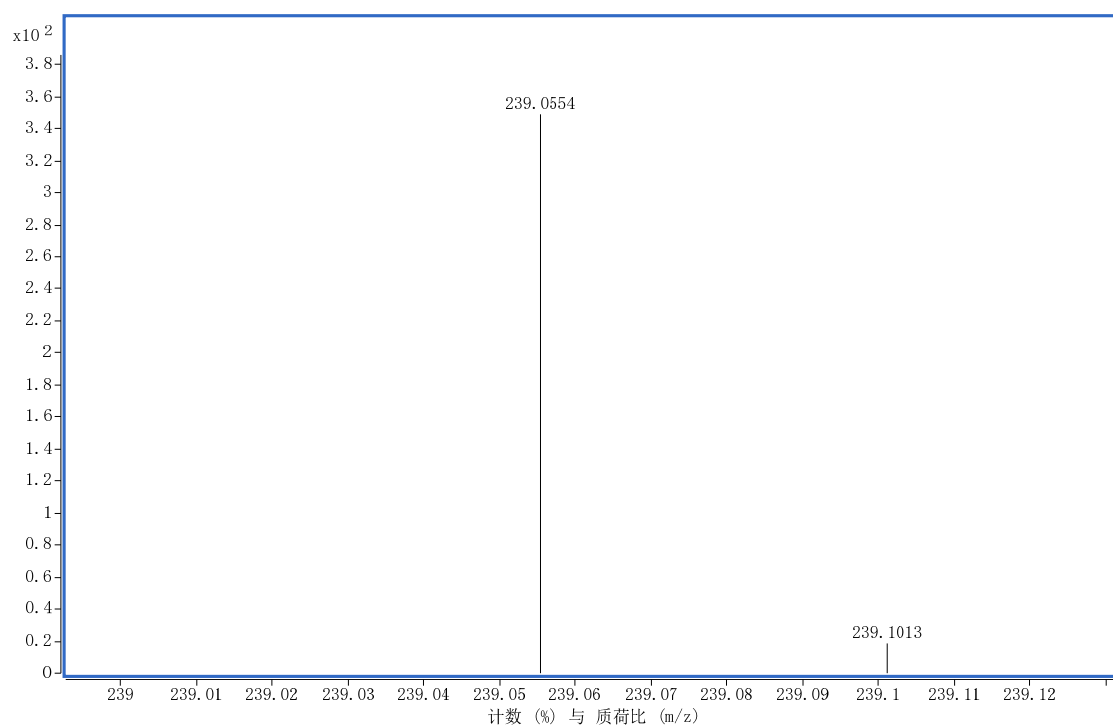

Figure S23. HRESIMS spectrum for 4

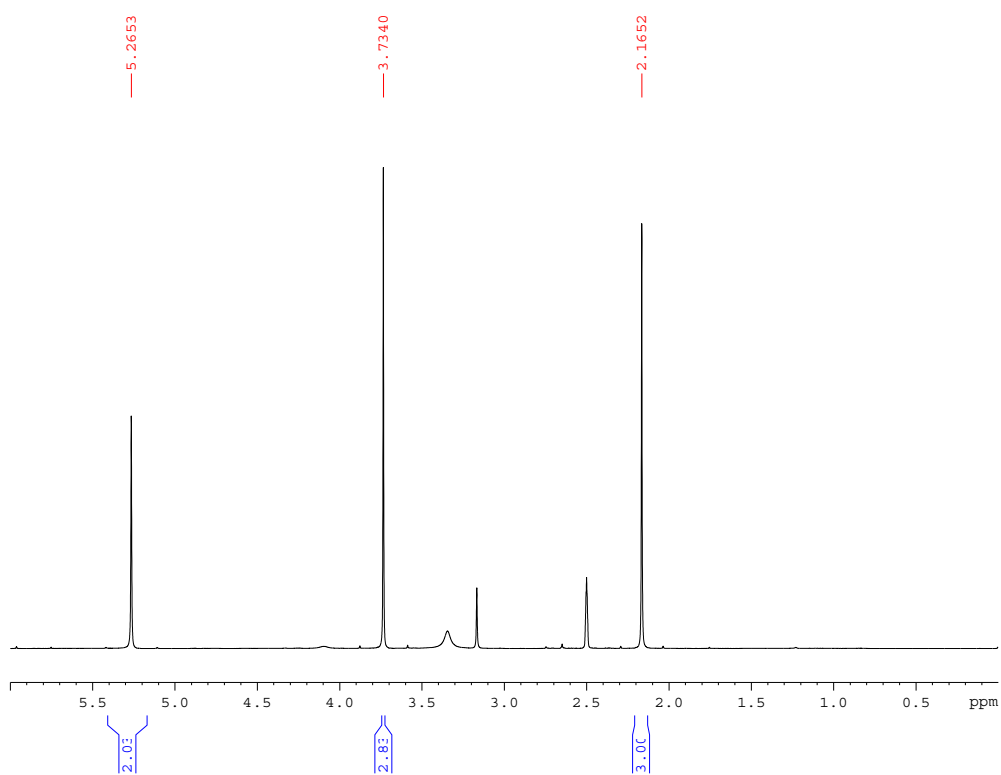

Figure S24. <sup>1</sup>H NMR spectrum (500 MHz, DMSO-*d*<sub>6</sub>) of 4

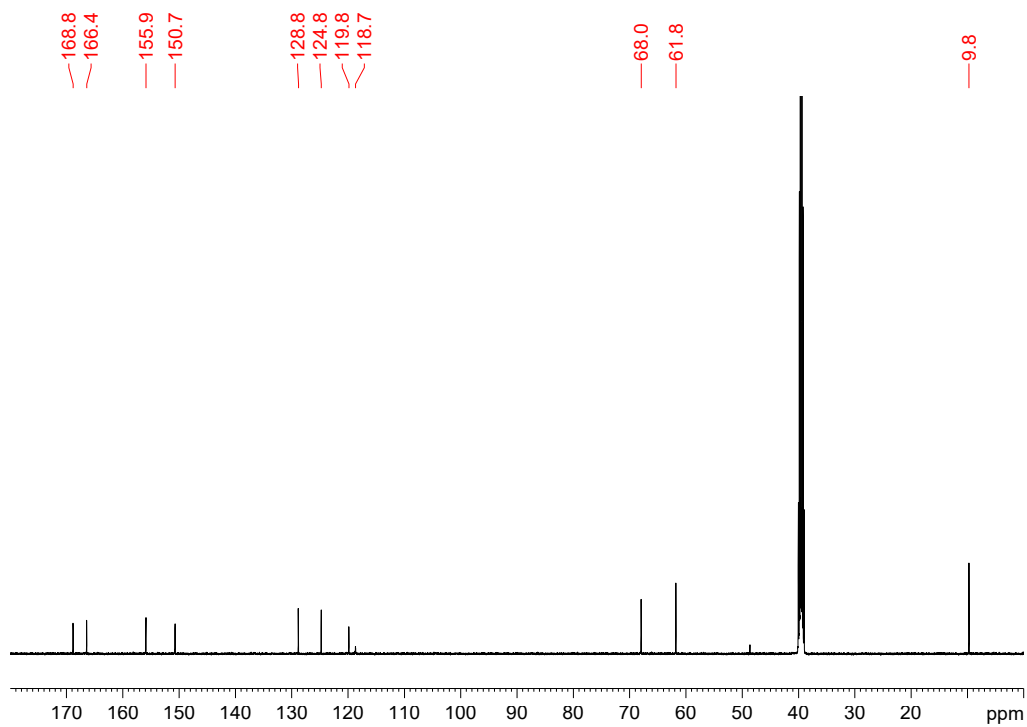

**Figure S25.**  $^{13}\text{C}$  NMR spectrum (125 MHz,  $\text{DMSO-}d_6$ ) of **4**

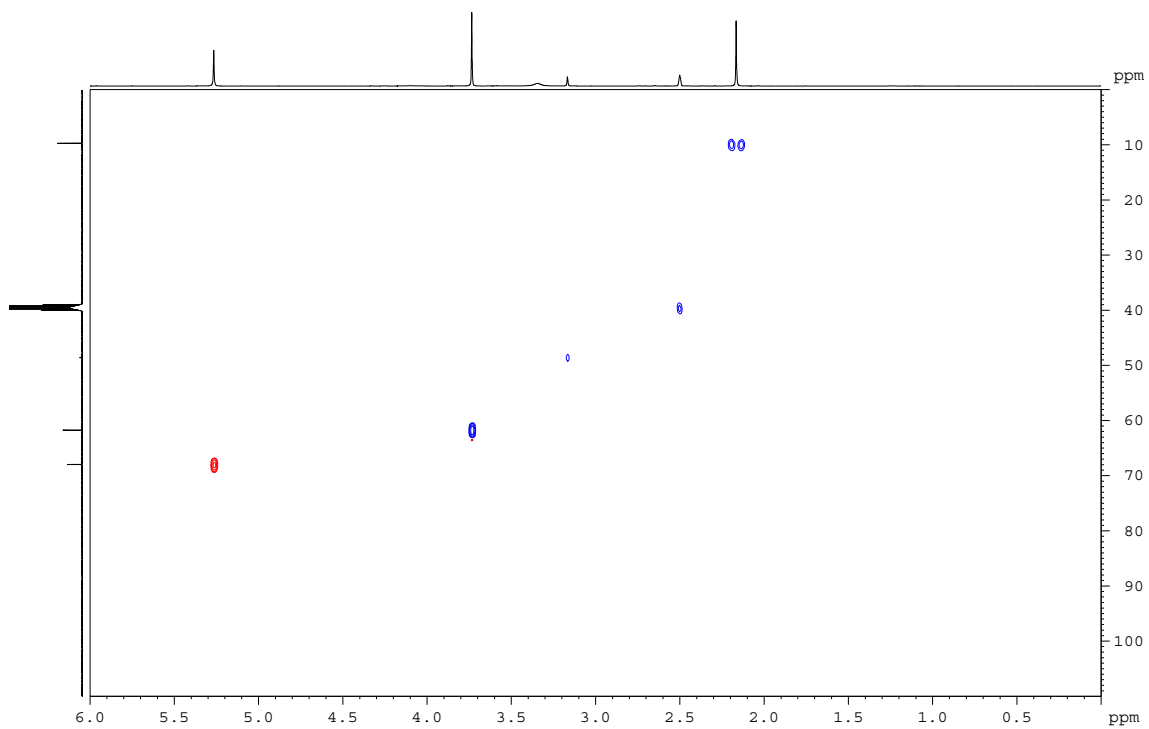

**Figure S26.** HSQC spectrum (500 MHz,  $\text{DMSO-}d_6$ ) of **4**

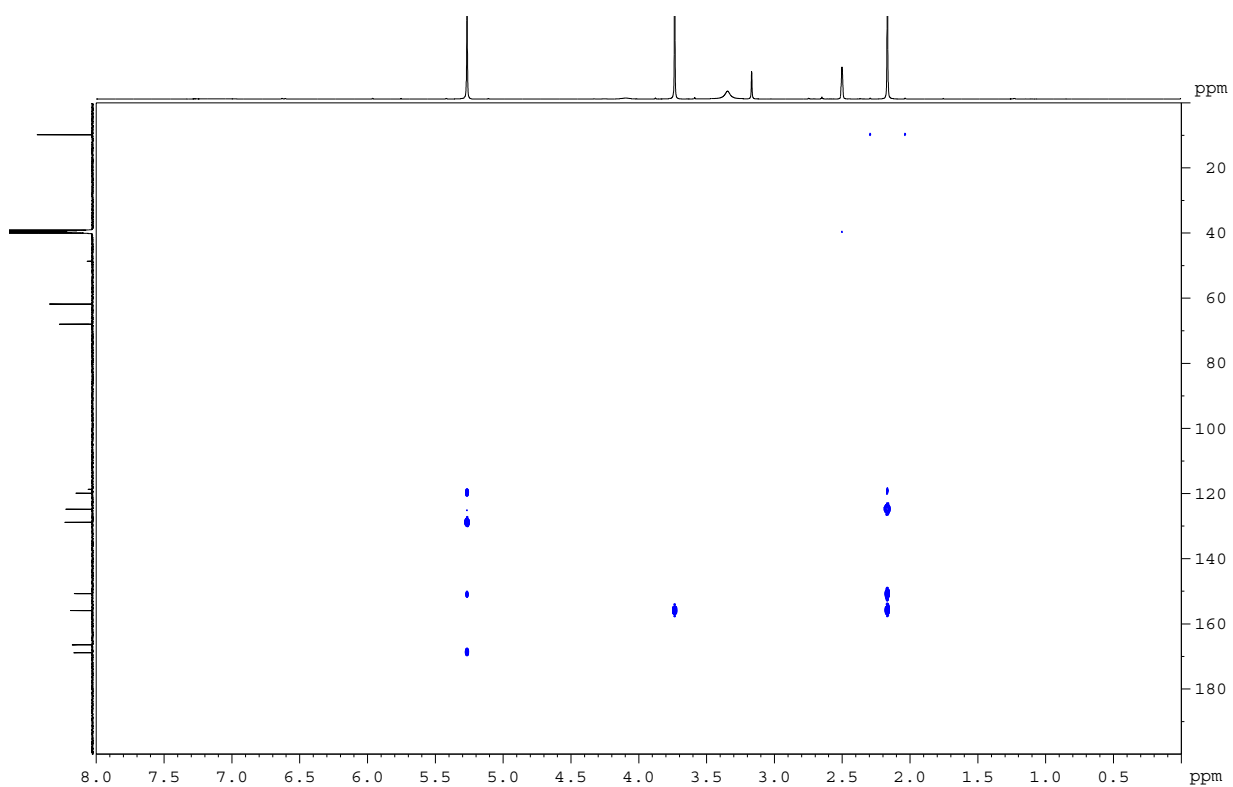

**Figure S27.** HMBC spectrum (500 MHz, DMSO-*d*<sub>6</sub>) of **4**

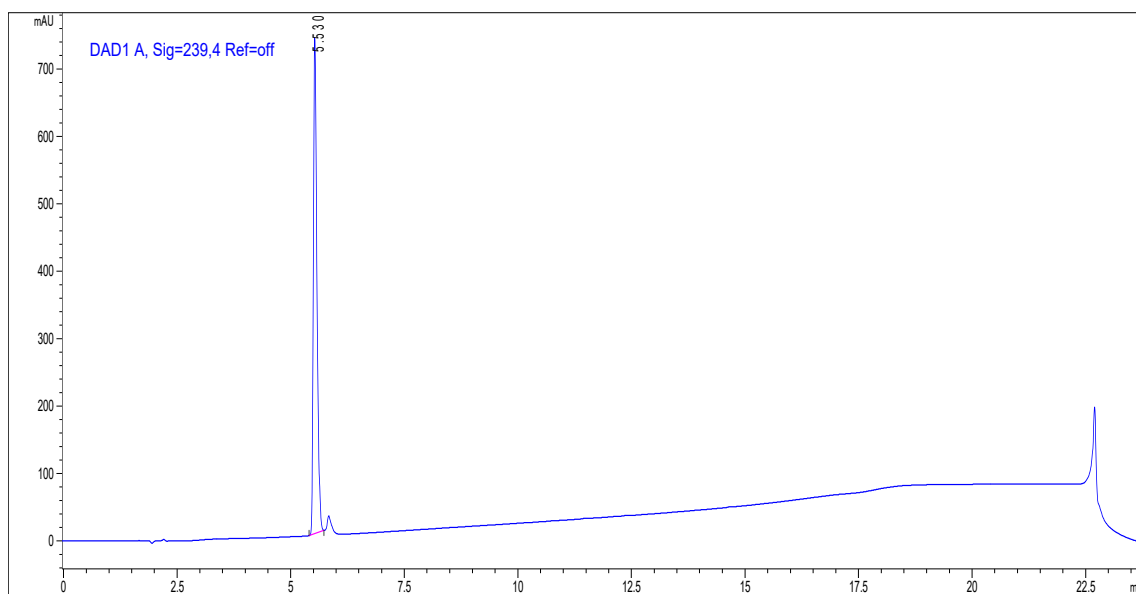

**Figure S28.** HPLC profile of **4**



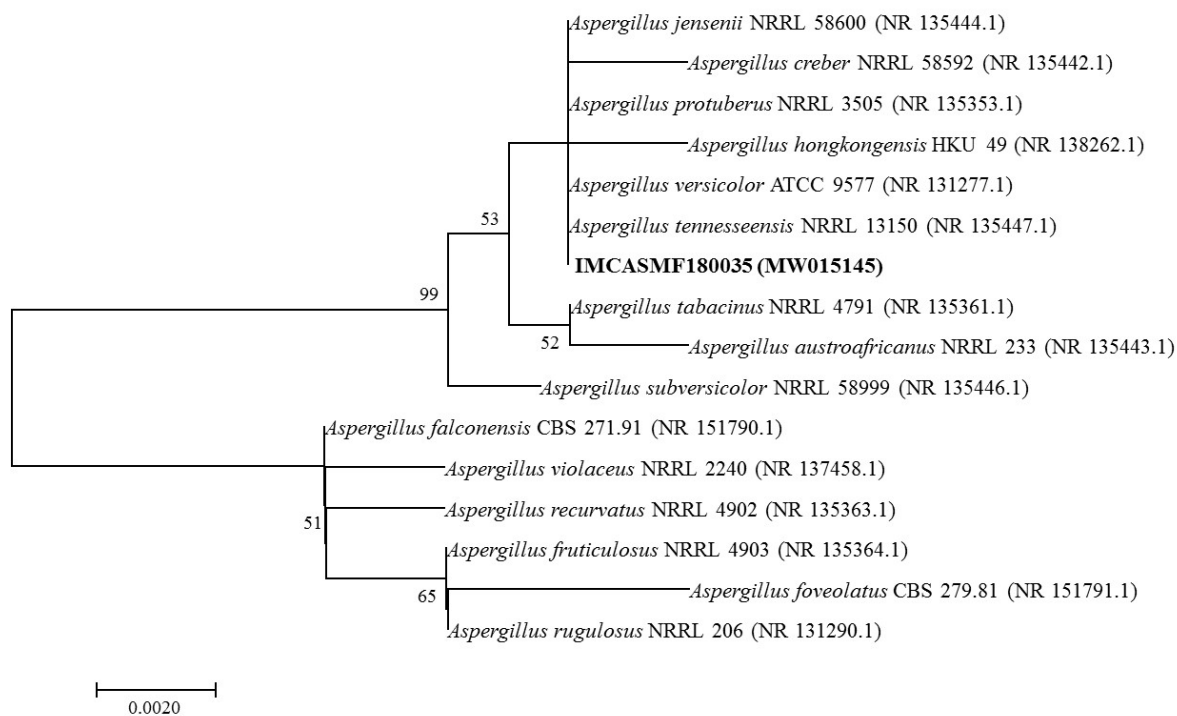

**Figure S29.** Neighbor-joining phylogenetic tree of IMCASM180035 and its most related type strains based on internal transcribed spacer region (ITS) from NCBI ITS database. Numbers at nodes indicate levels of bootstrap support (%) based on a neighbor joining analysis of 1,000 resampled datasets; only values >50 % are given. NCBI accession numbers are given in parentheses. Bar 0.002 nucleotide substitutions per site.
